# Supplementary material
Source: publisher figshare collection journal article supplement (https://acs.figshare.com/ndownloader/files/4681939)
Supplement: Supplementary file 1 [file 4681939]

Supporting information

## **Shape Evolution of Single-crystalline Mn<sub>2</sub>O<sub>3</sub> Using a Solvothermal Approach**

Wei-Na Li,<sup>†</sup> Lichun Zhang,<sup>†</sup> Shanthakumar Sithambaram,<sup>‡</sup> Jikang Yuan,<sup>†</sup> Xiong-Fei Shen,<sup>†</sup> Mark Aindow,<sup>†</sup> and Steven L. Suib<sup>†,‡,\*</sup>

<sup>†</sup>*Department of Chemical, Materials, & Biomolecular Engineering, and*

<sup>‡</sup>*Department of Chemistry*

*55 North Eagleville Rd.,*

*University of Connecticut, Storrs, CT 06269 (USA)*

*\* Corresponding author. E-mail: [steven.suib@uconn.edu](mailto:steven.suib@uconn.edu)*

A typical synthesis was as follows: 4 mmol of  $\text{Mn}(\text{NO}_3)_2$  was dissolved in 13 mL of an organic solvent followed by a vigorous stirring at room temperature for half an hour in a Teflon liner with a volume of 23 mL. Then the Teflon liner was transferred and sealed in an autoclave for heat treatment at 120 °C for 20 hours. A variety of different solvents were used to investigate the effect of solvents on the morphology of the resultant  $\text{Mn}_2\text{O}_3$ . In order to investigate the development of  $\text{Mn}_2\text{O}_3$  crystals, the reactions were also conducted at different temperatures from 100 °C to 180 °C for 20 hours and at times from 1.5 hours to 20 hours at 120 °C, all using ethanol as the solvent.

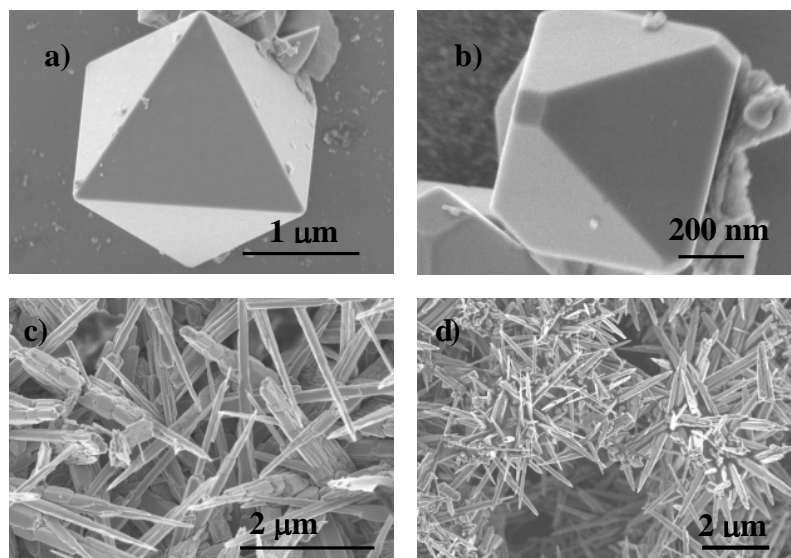

**Figure 1.** FESEM images of products synthesized in different solvents. a) ethanol, b) 2-butanol, c) benzene, and d) cyclohexane.

Enlarged FESEM pictures of the samples prepared in ethanol and 2-butanol are indicated in Figures 1a and 1b, respectively. The  $\text{Mn}_2\text{O}_3$  materials obtained in ethanol showed octahedral shapes (Figure 1a), while truncated-octahedral  $\text{Mn}_2\text{O}_3$  was observed using 2-butanol as solvent. When benzene and cyclohexane were applied in the system, rod-like  $\gamma\text{-MnO}_2$  was observed as indicated in Figures 1c and 1d. The formation of  $\gamma$ -

MnO<sub>2</sub> instead of Mn<sub>2</sub>O<sub>3</sub> materials may be due to the lack of –OH groups as reducing agents in benzene and cyclohexane.

Mn<sub>2</sub>O<sub>3</sub> octahedra can be formed over a range of temperatures from 100 °C to 160 °C without a significant change in morphology and crystallinity. However, when the temperature was increased to 180 °C, a mixture of bixbyite-c and  $\gamma$ - Mn<sub>2</sub>O<sub>3</sub> was produced with rough surfaces of octahedra (Figure 2e). Bixbyite-c octahedra thus cannot be stable up to 180 °C.

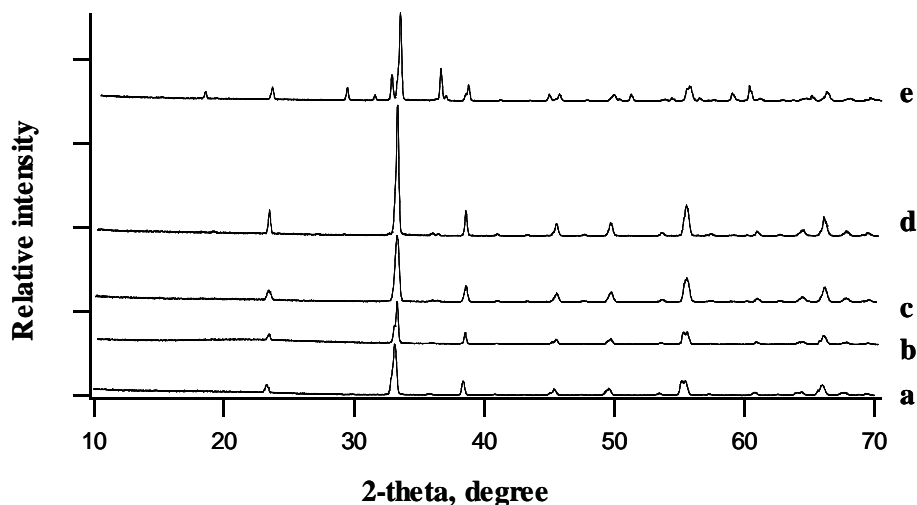

**Figure 2.** XRD patterns for the samples prepared at different temperatures. (a) 100 °C, (b) 120 °C, (c) 140 °C, (d) 160 °C, and (e) 180 °C.

Compared with Mn<sub>2</sub>O<sub>3</sub> synthesized in various solvents, Mn<sub>2</sub>O<sub>3</sub> samples under different reaction temperatures exhibit octahedral habits with similar diameters of 200 nm – 4  $\mu$ m as shown in Figure 3. However, the octahedra obtained at 100 °C formed aggregates, while the samples prepared at 120 °C, 140 °C, and 160 °C exhibit both aggregates and single octahedra. Unlike the octahedra prepared at relatively low temperatures of 100 °C

to 160 °C, the samples prepared at 180 °C indicate octahedra with very rough and bumped surfaces and broken octahedra as well (Figure 3e).

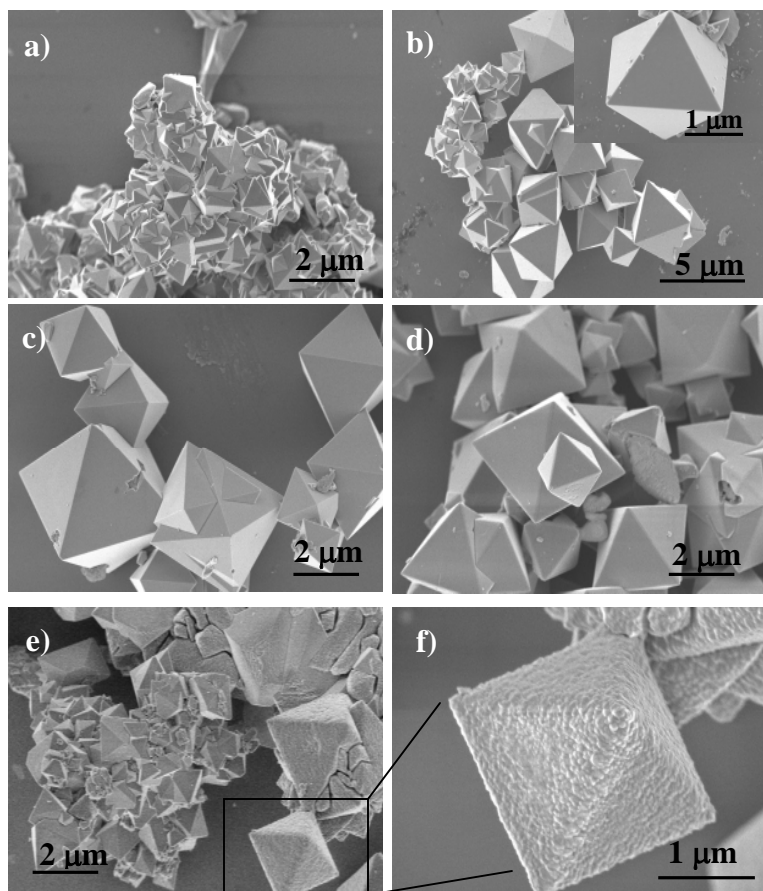

**Figure 3.** FESEM images of products synthesized under different reaction temperatures: a) 100 °C, b) 120 °C, c) 140 °C, d) 160 °C, and e) 180 °C, f) an enlarged image of typical octahedron synthesized at 180 °C.
